# Supplementary material
Source: PubMed Central journal article supplement (PMC4185292)

Fig. S1

**Klamath River watershed isolate LC16 is a member of the *Cyanobium gracile* cluster of *Synechococcus* sp.** Consensus phylogenetic tree depicting relationships between ITS sequences from *Synechococcus* isolates, including selected marine *Synechococcus* and *Prochlorococcus* isolates that serve as hosts for characterized cyanomyophages (indicated next to host names). The indicated *Cyanobium gracile* cluster of mostly freshwater isolates follows the definition of Ernst et al. (2003). The tree was constructed by maximum likelihood analysis with a TN93 (Tamura-Nei) substitution model using the PhyML package (Guindon and Gascuel, 2003). Bootstrap values are indicated.

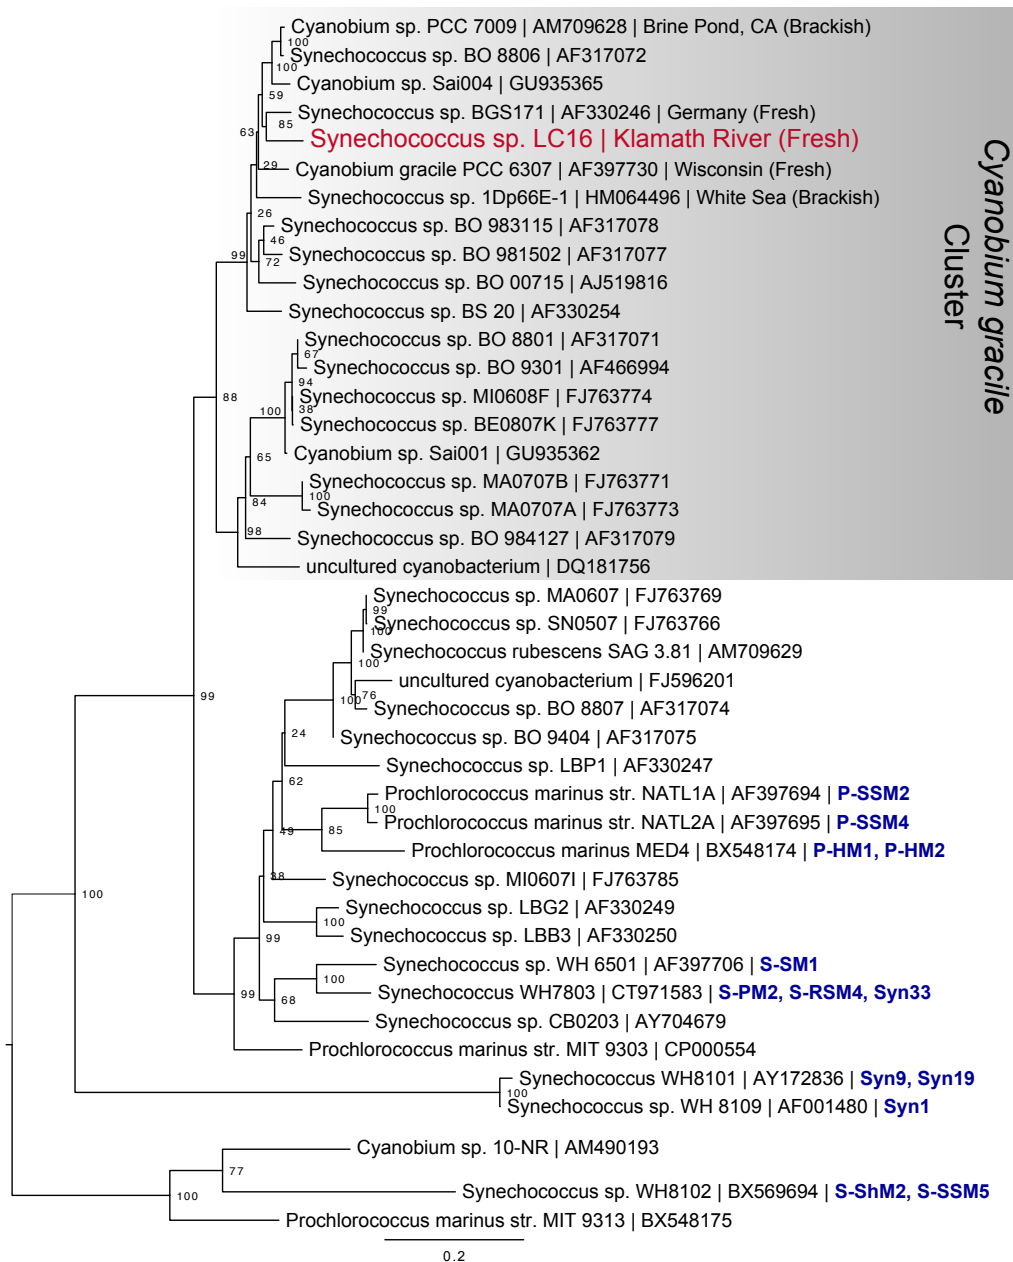

Fig. S2

**Number of common genes among S-CRM01, marine cyanomyophages and T4-like phages.** Gene similarities are based on BLAST hits with at least a 1e-5 E-value. Colors indicate levels of similarity.

|         | S-CRM01 | Syn1 | S-PM2 | Syn19 | syn9 | S-SM2 | S-SM1 | S-ShM2 | P-SSM2 | P-SSM4 | S-RSM4 | P-RSM4 | S-SSM5 | Syn33 | S-SSM7 | KVP40 | T4  | Aeh1 |
|---------|---------|------|-------|-------|------|-------|-------|--------|--------|--------|--------|--------|--------|-------|--------|-------|-----|------|
| S-CRM01 | 297     |      |       |       |      |       |       |        |        |        |        |        |        |       |        |       |     |      |
| Syn1    | 66      | 232  |       |       |      |       |       |        |        |        |        |        |        |       |        |       |     |      |
| S-PM2   | 75      | 144  | 239   |       |      |       |       |        |        |        |        |        |        |       |        |       |     |      |
| Syn19   | 62      | 111  | 88    | 215   |      |       |       |        |        |        |        |        |        |       |        |       |     |      |
| syn9    | 64      | 117  | 97    | 164   | 228  |       |       |        |        |        |        |        |        |       |        |       |     |      |
| S-SM2   | 72      | 132  | 100   | 138   | 140  | 266   |       |        |        |        |        |        |        |       |        |       |     |      |
| S-SM1   | 65      | 110  | 93    | 173   | 166  | 130   | 234   |        |        |        |        |        |        |       |        |       |     |      |
| S-ShM2  | 63      | 120  | 94    | 147   | 161  | 110   | 152   | 229    |        |        |        |        |        |       |        |       |     |      |
| P-SSM2  | 73      | 105  | 86    | 105   | 104  | 131   | 104   | 101    | 329    |        |        |        |        |       |        |       |     |      |
| P-SSM4  | 60      | 96   | 85    | 141   | 121  | 98    | 130   | 120    | 116    | 198    |        |        |        |       |        |       |     |      |
| S-RSM4  | 66      | 142  | 125   | 109   | 118  | 109   | 121   | 110    | 114    | 91     | 235    |        |        |       |        |       |     |      |
| P-RSM4  | 64      | 101  | 88    | 144   | 142  | 104   | 152   | 136    | 125    | 152    | 105    | 238    |        |       |        |       |     |      |
| S-SSM5  | 65      | 111  | 94    | 172   | 159  | 119   | 187   | 150    | 124    | 138    | 114    | 176    | 225    |       |        |       |     |      |
| Syn33   | 62      | 124  | 90    | 161   | 161  | 111   | 161   | 171    | 109    | 129    | 116    | 143    | 154    | 227   |        |       |     |      |
| S-SSM7  | 66      | 102  | 93    | 105   | 100  | 131   | 107   | 105    | 168    | 111    | 105    | 124    | 110    | 101   | 318    |       |     |      |
| KVP40   | 37      | 34   | 36    | 34    | 35   | 35    | 37    | 40     | 36     | 34     | 34     | 37     | 36     | 34    | 39     | 380   |     |      |
| T4      | 34      | 32   | 34    | 35    | 37   | 36    | 39    | 40     | 34     | 34     | 32     | 37     | 37     | 34    | 32     | 96    | 272 |      |
| Aeh1    | 33      | 33   | 34    | 34    | 33   | 31    | 32    | 36     | 31     | 33     | 33     | 31     | 32     | 31    | 32     | 95    | 109 | 352  |

Fig. S3

**Phylogenetic tree showing relationship of S-CRM01 *gp20* gene to other *gp20* sequences from freshwater or marine phage sources.**

See Fig. S1 for tree construction details. Cyanophages whose genomes have been sequenced are labeled by name and with a red hexagon. The group designations are taken from Sullivan et al. (2008). EU715812, closest to S-CRM01, represents phage P-ShM1 (Sullivan et al. (2008)).

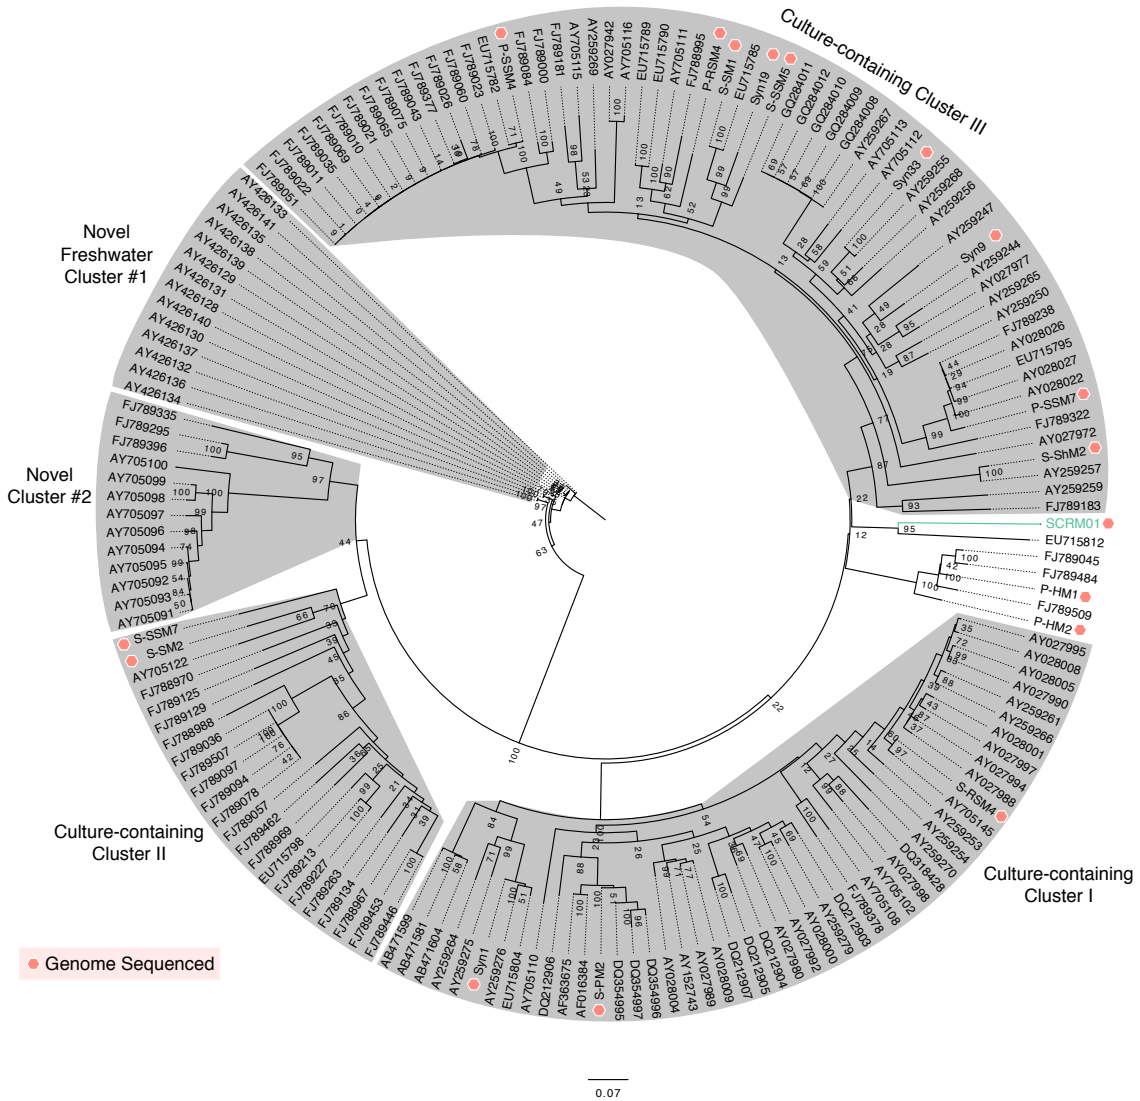

Fig. S4

**Phylogenetic tree showing relationship of S-CRM01 *psbA* gene to other *psbA* sequences from freshwater or marine phage sources.**

See Fig. S1 for tree construction details. Cyanophages whose genomes have been sequenced are labeled by name and with a red hexagon. The group designations are taken from Chénard and Suttle (2008). S-CRM01 sits between two a freshwater clade (EU258991-6 and EU404136) and a marine-dominated clade containing phage S-SSM7.

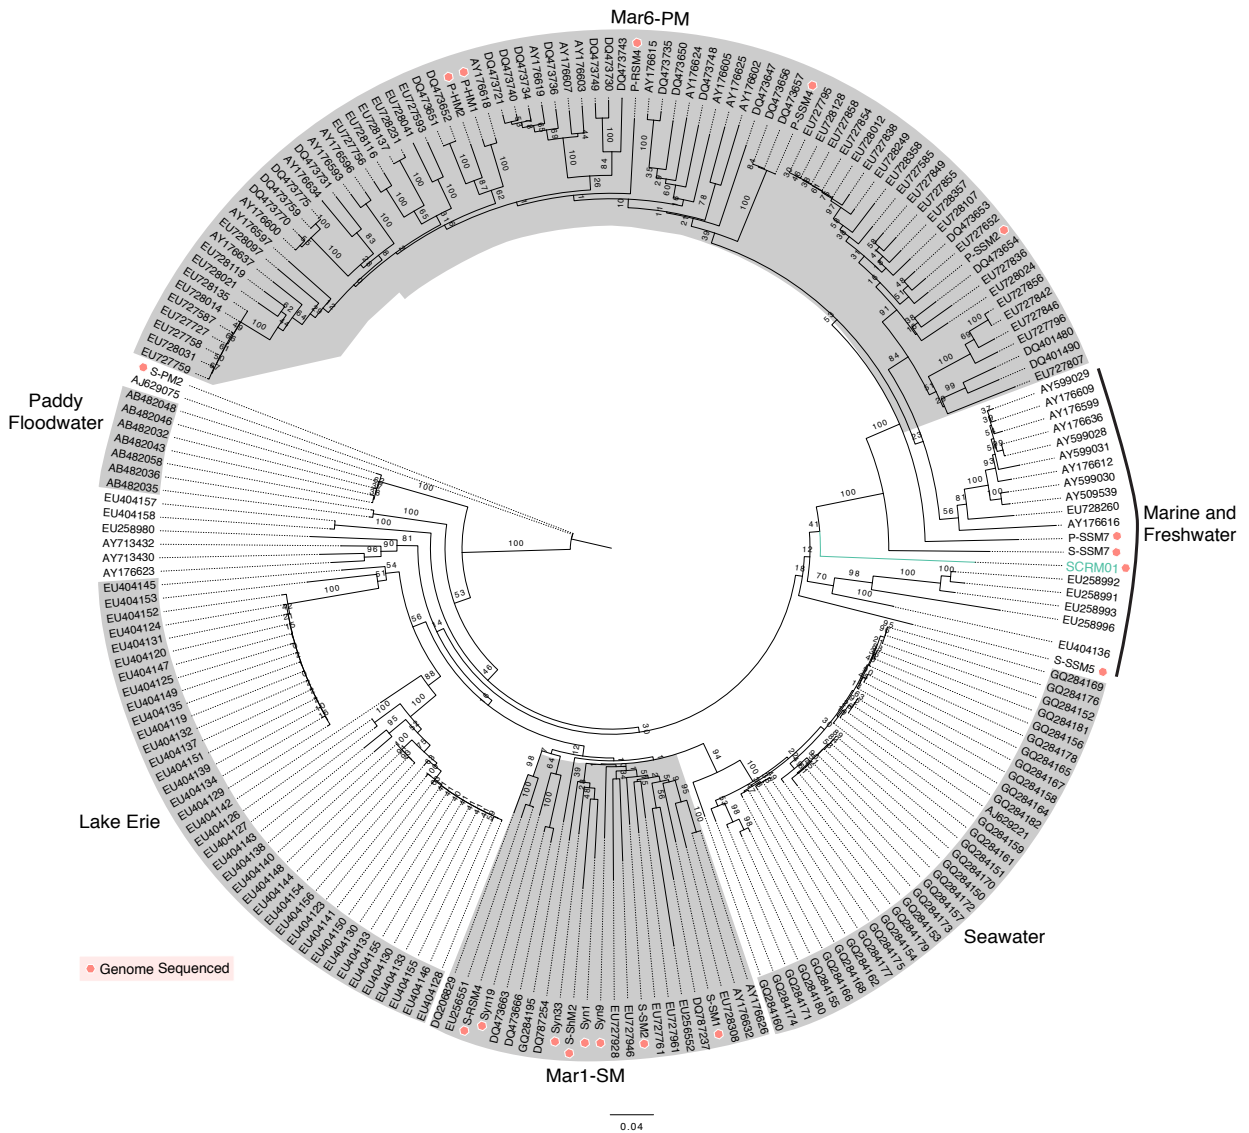

Supplement: NIHMS622979-supplement-Figures_S1-S4.pdf [file NIHMS622979-supplement-Figures_S1-S4.pdf]
